# Supplementary material
Source: HighWire-hosted journal article supplement (doi:10.1101/rna.080604.125)
Supplement: Supplemental_Table_S1.xlsx [file Supplemental_Table_S1.xlsx]

## Sheet: Melanocytes (-RNAse)
			CSDE1 IP -Rnase				IgG
Bait	Prey	PreyGene	Spec	SpecSum	AvgSpec	NumReplicates	ctrlCounts	AvgP	MaxP	TopoAvgP	TopoMaxP	SaintScore	FoldChange	BFDR
Q91W50	Q9Y3F4	STRAP	61|62|73	196	65.33	3	0|0|0	1	1	1	1	1	653.33	0
Q91W50	Q9H792	PEAK1	77|61|57	195	65	3	0|0|0	1	1	1	1	1	650	0
Q91W50	A0MZ66	SHTN1	81|104|121	306	102	3	0|0|1	1	1	1	1	1	306	0
Q91W50	Q8WXW3	PIBF1	36|21|20	77	25.67	3	0|0|0	1	1	1	1	1	256.67	0
Q91W50	Q7Z3E5	ARMC9	21|17|24	62	20.67	3	0|0|0	1	1	1	1	1	206.67	0
Q91W50	Q9Y4D8	HECTD4	10|13|22	45	15	3	0|0|0	1	1	1	1	1	150	0
Q91W50	Q9H1A4	ANAPC1	10|13|13	36	12	3	0|0|0	1	1	1	1	1	120	0
Q91W50	Q6DD87	ZNF787	9|10|13	32	10.67	3	0|0|0	1	1	1	1	1	106.67	0
Q91W50	Q9H6S1	AZI2	14|7|10	31	10.33	3	0|0|0	1	1	1	1	1	103.33	0
Q91W50	P01024	C3	11|10|10	31	10.33	3	0|0|0	1	1	1	1	1	103.33	0
Q91W50	Q9UKK3	PARP4	11|7|10	28	9.33	3	0|0|0	1	1	1	1	1	93.33	0
Q91W50	P30260	CDC27	10|5|10	25	8.33	3	0|0|0	1	1	1	1	1	83.33	0
Q91W50	Q6PJG2	MIDEAS	4|7|12	23	7.67	3	0|0|0	1	1	1	1	1	76.67	0
Q91W50	Q9UJX3	ANAPC7	7|9|6	22	7.33	3	0|0|0	1	1	1	1	1	73.33	0
Q91W50	Q7Z2K8	GPRIN1	1|11|10	22	7.33	3	0|0|0	0.67	1	0.67	1	0.67	73.33	0.04
Q91W50	Q14643	ITPR1	4|10|7	21	7	3	0|0|0	1	1	1	1	1	70	0
Q91W50	P49815	TSC2	6|9|6	21	7	3	0|0|0	1	1	1	1	1	70	0
Q91W50	Q13042	CDC16	6|5|8	19	6.33	3	0|0|0	1	1	1	1	1	63.33	0
Q91W50	P61964	WDR5	4|6|6	16	5.33	3	0|0|0	1	1	1	1	1	53.33	0
Q91W50	Q9UJX2	CDC23	3|4|8	15	5	3	0|0|0	0.99	1	0.99	1	0.99	50	0
Q91W50	Q9UHD2	TBK1	5|3|5	13	4.33	3	0|0|0	0.99	1	0.99	1	0.99	43.33	0
Q91W50	Q14571	ITPR2	4|5|4	13	4.33	3	0|0|0	1	1	1	1	1	43.33	0
Q91W50	P19823	ITIH2	4|3|5	12	4	3	0|0|0	0.99	1	0.99	1	0.99	40	0
Q91W50	O15169	AXIN1	3|5|4	12	4	3	0|0|0	0.99	1	0.99	1	0.99	40	0
Q91W50	Q9Y597	KCTD3	5|3|3	11	3.67	3	0|0|0	0.99	1	0.99	1	0.99	36.67	0
Q91W50	Q14573	ITPR3	12|12|10	34	11.33	3	0|0|1	1	1	1	1	1	34	0
Q91W50	P0C0L4	C4A	2|4|4	10	3.33	3	0|0|0	0.97	1	0.97	1	0.97	33.33	0
Q91W50	P35270	SPR	2|4|4	10	3.33	3	0|0|0	0.97	1	0.97	1	0.97	33.33	0
Q91W50	P07996	THBS1	14|8|9	31	10.33	3	1|0|0	1	1	1	1	1	31	0
Q91W50	P78362	SRPK2	3|3|3	9	3	3	0|0|0	0.98	0.98	0.98	0.98	0.98	30	0
Q91W50	Q9HD42	CHMP1A	4|2|3	9	3	3	0|0|0	0.96	1	0.96	1	0.96	30	0
Q91W50	P01031	C5	4|3|2	9	3	3	0|0|0	0.96	1	0.96	1	0.96	30	0
Q91W50	Q9P2R6	RERE	3|4|2	9	3	3	0|0|0	0.96	1	0.96	1	0.96	30	0
Q91W50	O75592	MYCBP2	14|7|6	27	9	3	0|0|1	1	1	1	1	1	27	0
Q91W50	Q01105	SET	2|2|3	7	2.33	3	0|0|0	0.93	0.98	0.93	0.98	0.93	23.33	0.01
Q91W50	P04196	HRG	3|2|2	7	2.33	3	0|0|0	0.93	0.98	0.93	0.98	0.93	23.33	0.01
Q91W50	Q8NHZ8	CDC26	2|3|2	7	2.33	3	0|0|0	0.93	0.98	0.93	0.98	0.93	23.33	0.01
Q91W50	O15027	SEC16A	56|52|40	148	49.33	3	0|1|6	1	1	1	1	1	21.14	0
Q91W50	Q96DE5	ANAPC16	2|2|2	6	2	3	0|0|0	0.91	0.91	0.91	0.91	0.91	20	0.01
Q91W50	Q8IVF2	AHNAK2	69|23|19	111	37	3	3|1|2	1	1	1	1	1	18.5	0
Q91W50	Q92574	TSC1	22|14|13	49	16.33	3	3|0|0	0.99	1	0.99	1	0.99	16.33	0
Q91W50	Q16555	DPYSL2	22|24|29	75	25	3	0|1|4	1	1	1	1	1	15	0
Q91W50	P38646	HSPA9	34|32|38	104	34.67	3	2|2|3	1	1	1	1	1	14.86	0
Q91W50	Q96JN8	NEURL4	1|5|6	12	4	3	0|0|1	0.67	1	0.67	1	0.67	12	0.04
Q91W50	Q96PE2	ARHGEF17	77|52|47	176	58.67	3	15|1|0	0.98	0.99	0.98	0.99	0.98	11	0
Q91W50	Q9Y6M1	IGF2BP2	30|28|27	85	28.33	3	6|1|1	1	1	1	1	1	10.62	0
Q91W50	Q8N2K0	ABHD12	12|8|11	31	10.33	3	0|1|2	1	1	1	1	1	10.33	0
Q91W50	P28290	ITPRID2	8|11|10	29	9.67	3	0|3|1	0.95	0.99	0.95	0.99	0.95	7.25	0.01
Q91W50	Q9Y4F5	CEP170B	3|6|5	14	4.67	3	0|1|1	0.79	0.98	0.79	0.98	0.79	7	0.02
Q91W50	P30101	PDIA3	8|5|7	20	6.67	3	1|1|1	0.91	0.99	0.91	0.99	0.91	6.67	0.01
Q91W50	P27824	CANX	11|4|5	20	6.67	3	0|2|1	0.76	1	0.76	1	0.76	6.67	0.02
Q91W50	P53396	ACLY	12|15|17	44	14.67	3	0|0|7	0.81	0.87	0.81	0.87	0.81	6.29	0.01
Q91W50	O00425	IGF2BP3	32|16|13	61	20.33	3	11|0|0	0.7	0.94	0.7	0.94	0.7	5.55	0.03
Q91W50	Q15154	PCM1	13|10|6	29	9.67	3	1|1|4	0.75	1	0.75	1	0.75	4.83	0.03
Q91W50	Q7L2E3	DHX30	18|8|7	33	11	3	3|1|3	0.7	1	0.7	1	0.7	4.71	0.03
Q91W50	Q92900	UPF1	31|23|26	80	26.67	3	7|4|7	1	1	1	1	1	4.44	0
Q91W50	Q14764	MVP	99|83|83	265	88.33	3	30|17|18	1	1	1	1	1	4.08	0
		57

## Sheet: Mel-ST (-RNAse)
			CSDE1 IP -Rnase				IgG IP -Rnase
Bait	Human ID	PreyGene	Spec	SpecSum	AvgSpec	NumReplicates	ctrlCounts	AvgP	MaxP	TopoAvgP	TopoMaxP	SaintScore	FoldChange	BFDR
O75534	Q3KQU3	MAP7D1	9|8|5	22	7.33	3	0|0|0	1	1	1	1	1	73.33	0
O75534	P46013	MKI67	16|14|9	39	13	3	0|0|0	1	1	1	1	1	130	0
O75534	Q02241	KIF23	3|2|0	5	1.67	3	0|0|0	0.67	1	0.67	1	0.67	16.67	0.04
O75534	Q12965	MYO1E	19|16|13	48	16	3	0|0|0	1	1	1	1	1	160	0
O75534	P07437	TUBB	21|18|14	53	17.67	3	1|0|0	1	1	1	1	1	53	0
O75534	P16402	H1-3	4|7|6	17	5.67	3	0|0|0	1	1	1	1	1	56.67	0
O75534	P61247	RPS3A	9|12|5	26	8.67	3	0|0|0	1	1	1	1	1	86.67	0
O75534	Q5T9A4	ATAD3B	16|16|15	47	15.67	3	0|0|0	1	1	1	1	1	156.67	0
O75534	Q92522	H1-10	3|2|1	6	2	3	0|0|0	0.67	1	0.67	1	0.67	20	0.04
O75534	Q13310	PABPC4	12|13|10	35	11.67	3	0|0|0	1	1	1	1	1	116.67	0
O75534	Q6DD87	ZNF787	7|3|4	14	4.67	3	0|0|0	1	1	1	1	1	46.67	0
O75534	P46778	RPL21	6|7|5	18	6	3	0|0|0	1	1	1	1	1	60	0
O75534	Q13243	SRSF5	4|4|2	10	3.33	3	0|0|0	1	1	1	1	1	33.33	0
O75534	Q6NZI2	CAVIN1	25|19|13	57	19	3	0|0|0	1	1	1	1	1	190	0
O75534	Q08211	DHX9	15|17|17	49	16.33	3	0|0|0	1	1	1	1	1	163.33	0
O75534	P04264	KRT1	47|36|3	86	28.67	3	16|0|0	0.67	1	0.67	1	0.67	5.38	0.04
O75534	P68363	TUBA1B	10|12|12	34	11.33	3	0|0|0	1	1	1	1	1	113.33	0
O75534	P0DP23	CALM1	10|8|8	26	8.67	3	0|0|0	1	1	1	1	1	86.67	0
O75534	P62424	RPL7A	17|22|18	57	19	3	0|0|0	1	1	1	1	1	190	0
O75534	P46776	RPL27A	4|7|5	16	5.33	3	0|0|0	1	1	1	1	1	53.33	0
O75534	P18124	RPL7	13|11|10	34	11.33	3	0|0|0	1	1	1	1	1	113.33	0
O75534	P05388	RPLP0	7|6|5	18	6	3	0|0|0	1	1	1	1	1	60	0
O75534	P40429	RPL13A	5|5|6	16	5.33	3	0|0|0	1	1	1	1	1	53.33	0
O75534	P08670	VIM	22|24|16	62	20.67	3	8|0|0	1	1	1	1	1	7.75	0
O75534	P15880	RPS2	4|4|2	10	3.33	3	0|0|0	1	1	1	1	1	33.33	0
O75534	P39023	RPL3	14|17|16	47	15.67	3	0|0|0	1	1	1	1	1	156.67	0
O75534	P11940	PABPC1	22|17|17	56	18.67	3	0|0|0	1	1	1	1	1	186.67	0
O75534	P35251	RFC1	4|3|3	10	3.33	3	0|0|0	1	1	1	1	1	33.33	0
O75534	P30050	RPL12	3|4|5	12	4	3	0|0|0	1	1	1	1	1	40	0
O75534	Q07020	RPL18	9|9|6	24	8	3	0|0|0	1	1	1	1	1	80	0
O75534	P38646	HSPA9	10|16|16	42	14	3	0|0|0	1	1	1	1	1	140	0
O75534	P46779	RPL28	5|4|3	12	4	3	0|0|0	1	1	1	1	1	40	0
O75534	O43795	MYO1B	9|11|8	28	9.33	3	0|0|0	1	1	1	1	1	93.33	0
O75534	P46777	RPL5	8|8|6	22	7.33	3	0|0|0	1	1	1	1	1	73.33	0
O75534	P05141	SLC25A5	3|3|2	8	2.67	3	0|0|0	1	1	1	1	1	26.67	0
O75534	P62906	RPL10A	7|7|9	23	7.67	3	0|0|0	1	1	1	1	1	76.67	0
O75534	P60709	ACTB	20|19|19	58	19.33	3	4|0|0	1	1	1	1	1	14.5	0
O75534	P61254	RPL26	6|11|6	23	7.67	3	0|0|0	1	1	1	1	1	76.67	0
O75534	P61353	RPL27	6|6|7	19	6.33	3	0|0|0	1	1	1	1	1	63.33	0
O75534	P62081	RPS7	6|1|3	10	3.33	3	0|0|0	0.67	1	0.67	1	0.67	33.33	0.01
O75534	P62241	RPS8	8|8|7	23	7.67	3	0|0|0	1	1	1	1	1	76.67	0
O75534	P62263	RPS14	5|7|8	20	6.67	3	0|0|0	1	1	1	1	1	66.67	0
O75534	P62266	RPS23	2|4|2	8	2.67	3	0|0|0	1	1	1	1	1	26.67	0
O75534	P62269	RPS18	2|3|2	7	2.33	3	0|0|0	1	1	1	1	1	23.33	0
O75534	P62273	RPS29	3|3|2	8	2.67	3	0|0|0	1	1	1	1	1	26.67	0
O75534	P62280	RPS11	8|7|2	17	5.67	3	0|0|0	1	1	1	1	1	56.67	0
O75534	P62701	RPS4X	9|8|6	23	7.67	3	0|0|0	1	1	1	1	1	76.67	0
O75534	Q02543	RPL18A	6|5|5	16	5.33	3	0|0|0	1	1	1	1	1	53.33	0
O75534	P62750	RPL23A	7|5|7	19	6.33	3	0|0|0	1	1	1	1	1	63.33	0
O75534	P62829	RPL23	3|4|3	10	3.33	3	0|0|0	1	1	1	1	1	33.33	0
O75534	P62851	RPS25	4|2|2	8	2.67	3	0|0|0	1	1	1	1	1	26.67	0
O75534	P62854	RPS26	4|3|2	9	3	3	0|0|0	1	1	1	1	1	30	0
O75534	P62888	RPL30	4|2|2	8	2.67	3	0|0|0	1	1	1	1	1	26.67	0
O75534	P62899	RPL31	2|2|2	6	2	3	0|0|0	1	1	1	1	1	20	0
O75534	P23396	RPS3	2|2|2	6	2	3	0|0|0	1	1	1	1	1	20	0
O75534	P62917	RPL8	12|12|9	33	11	3	0|0|0	1	1	1	1	1	110	0
O75534	P67809	YBX1	23|27|22	72	24	3	0|0|0	1	1	1	1	1	240	0
O75534	P11142	HSPA8	11|9|6	26	8.67	3	0|0|0	1	1	1	1	1	86.67	0
O75534	P63261	ACTG1	20|19|19	58	19.33	3	4|0|0	1	1	1	1	1	14.5	0
O75534	P08708	RPS17	4|4|4	12	4	3	0|0|0	1	1	1	1	1	40	0
O75534	P25398	RPS12	7|3|6	16	5.33	3	0|0|0	1	1	1	1	1	53.33	0
O75534	P46783	RPS10	4|4|2	10	3.33	3	0|0|0	1	1	1	1	1	33.33	0
O75534	P68133	ACTA1	15|16|15	46	15.33	3	2|0|0	1	1	1	1	1	23	0
O75534	P68371	TUBB4B	18|15|11	44	14.67	3	2|0|0	1	1	1	1	1	22	0
O75534	Q9BQE3	TUBA1C	7|11|7	25	8.33	3	0|0|0	1	1	1	1	1	83.33	0
O75534	P84098	RPL19	9|12|9	30	10	3	0|0|0	1	1	1	1	1	100	0
O75534	P84103	SRSF3	1|4|4	9	3	3	0|0|0	0.67	1	0.67	1	0.67	30	0.01
O75534	P46782	RPS5	2|5|3	10	3.33	3	0|0|0	1	1	1	1	1	33.33	0
O75534	Q13283	G3BP1	2|3|3	8	2.67	3	0|0|0	1	1	1	1	1	26.67	0
O75534	Q13247	SRSF6	6|4|3	13	4.33	3	0|0|0	1	1	1	1	1	43.33	0
O75534	Q9UHX1	PUF60	2|2|2	6	2	3	0|0|0	1	1	1	1	1	20	0
O75534	Q7Z2W4	ZC3HAV1	3|3|2	8	2.67	3	0|0|0	1	1	1	1	1	26.67	0
O75534	O95714	HERC2	2|4|0	6	2	3	0|0|0	0.67	1	0.67	1	0.67	20	0.03
O75534	Q8IYB3	SRRM1	5|6|6	17	5.67	3	0|0|0	1	1	1	1	1	56.67	0
O75534	P60660	MYL6	8|6|3	17	5.67	3	0|0|0	1	1	1	1	1	56.67	0
O75534	Q14444	CAPRIN1	2|3|2	7	2.33	3	0|0|0	1	1	1	1	1	23.33	0
O75534	Q92974	ARHGEF2	26|26|18	70	23.33	3	0|0|0	1	1	1	1	1	233.33	0
O75534	P02533	KRT14	7|3|1	11	3.67	3	1|0|0	0.67	1	0.67	1	0.67	11	0.03
O75534	P06748	NPM1	6|5|5	16	5.33	3	0|0|0	1	1	1	1	1	53.33	0
O75534	Q01130	SRSF2	5|4|5	14	4.67	3	0|0|0	1	1	1	1	1	46.67	0
O75534	Q16777	H2AC20	3|4|3	10	3.33	3	0|0|0	1	1	1	1	1	33.33	0
O75534	Q5SW79	CEP170	48|56|45	149	49.67	3	0|0|0	1	1	1	1	1	496.67	0
O75534	Q07955	SRSF1	8|6|4	18	6	3	0|0|0	1	1	1	1	1	60	0
O75534	Q5UIP0	RIF1	13|16|10	39	13	3	0|0|0	1	1	1	1	1	130	0
O75534	Q6PKG0	LARP1	4|7|3	14	4.67	3	0|0|0	1	1	1	1	1	46.67	0
O75534	Q71UM5	RPS27L	3|2|1	6	2	3	0|0|0	0.67	1	0.67	1	0.67	20	0.04
O75534	O60506	SYNCRIP	4|3|4	11	3.67	3	0|0|0	1	1	1	1	1	36.67	0
O75534	Q9Y383	LUC7L2	3|3|4	10	3.33	3	0|0|0	1	1	1	1	1	33.33	0
O75534	P83731	RPL24	6|6|3	15	5	3	0|0|0	1	1	1	1	1	50	0
O75534	Q9UQ35	SRRM2	16|18|17	51	17	3	0|0|0	1	1	1	1	1	170	0
O75534	Q63ZY3	KANK2	7|7|6	20	6.67	3	0|0|0	1	1	1	1	1	66.67	0
O75534	Q96PK6	RBM14	3|2|2	7	2.33	3	0|0|0	1	1	1	1	1	23.33	0
O75534	Q9BTC0	DIDO1	3|0|3	6	2	3	0|0|0	0.67	1	0.67	1	0.67	20	0.02
O75534	P43243	MATR3	5|5|5	15	5	3	0|0|0	1	1	1	1	1	50	0
O75534	P35579	MYH9	53|45|48	146	48.67	3	3|0|0	1	1	1	1	1	48.67	0
O75534	Q08170	SRSF4	6|4|3	13	4.33	3	0|0|0	1	1	1	1	1	43.33	0
O75534	Q9NUQ6	SPATS2L	7|6|2	15	5	3	0|0|0	1	1	1	1	1	50	0
O75534	Q9BUF5	TUBB6	4|5|2	11	3.67	3	0|0|0	1	1	1	1	1	36.67	0
O75534	P46087	NOP2	4|3|2	9	3	3	0|0|0	1	1	1	1	1	30	0
O75534	P13647	KRT5	13|6|1	20	6.67	3	1|0|0	0.67	1	0.67	1	0.67	20	0
O75534	Q9NVI7	ATAD3A	21|19|19	59	19.67	3	0|0|0	1	1	1	1	1	196.67	0
O75534	Q9P2E9	RRBP1	18|23|15	56	18.67	3	0|0|0	1	1	1	1	1	186.67	0
O75534	O00425	IGF2BP3	7|7|1	15	5	3	0|0|0	0.67	1	0.67	1	0.67	50	0.01
O75534	P50914	RPL14	8|8|6	22	7.33	3	0|0|0	1	1	1	1	1	73.33	0
O75534	P62913	RPL11	4|6|4	14	4.67	3	0|0|0	1	1	1	1	1	46.67	0
O75534	Q12905	ILF2	3|2|2	7	2.33	3	0|0|0	1	1	1	1	1	23.33	0
O75534	Q8NC51	SERBP1	2|3|2	7	2.33	3	0|0|0	1	1	1	1	1	23.33	0
O75534	P61313	RPL15	11|7|7	25	8.33	3	0|0|0	1	1	1	1	1	83.33	0
O75534	P39019	RPS19	4|6|6	16	5.33	3	0|0|0	1	1	1	1	1	53.33	0
O75534	P52272	HNRNPM	23|23|21	67	22.33	3	0|0|0	1	1	1	1	1	223.33	0
O75534	P04350	TUBB4A	15|11|7	33	11	3	1|0|0	1	1	1	1	1	33	0
O75534	P36578	RPL4	18|20|20	58	19.33	3	0|0|0	1	1	1	1	1	193.33	0
O75534	Q14764	MVP	2|2|2	6	2	3	0|0|0	1	1	1	1	1	20	0
O75534	Q9NR30	DDX21	6|6|10	22	7.33	3	0|0|0	1	1	1	1	1	73.33	0
O75534	Q9UKV3	ACIN1	2|2|3	7	2.33	3	0|0|0	1	1	1	1	1	23.33	0
O75534	P16989	YBX3	6|12|8	26	8.67	3	0|0|0	1	1	1	1	1	86.67	0
O75534	Q04695	KRT17	7|2|1	10	3.33	3	0|0|0	0.67	1	0.67	1	0.67	33.33	0.03
O75534	Q15149	PLEC	22|17|8	47	15.67	3	0|0|0	1	1	1	1	1	156.67	0
O75534	O00159	MYO1C	5|7|5	17	5.67	3	0|0|0	1	1	1	1	1	56.67	0
O75534	P38159	RBMX	4|1|3	8	2.67	3	0|0|0	0.67	1	0.67	1	0.67	26.67	0.02
O75534	O95793	STAU1	3|3|1	7	2.33	3	0|0|0	0.67	1	0.67	1	0.67	23.33	0.02
O75534	Q12906	ILF3	13|16|11	40	13.33	3	0|0|0	1	1	1	1	1	133.33	0
O75534	Q9Y3F4	STRAP	16|11|15	42	14	3	0|0|0	1	1	1	1	1	140	0
O75534	P07910	HNRNPC	7|5|4	16	5.33	3	0|0|0	1	1	1	1	1	53.33	0
O75534	P08779	KRT16	8|3|1	12	4	3	1|0|0	0.67	1	0.67	1	0.67	12	0.03
O75534	P04259	KRT6B	13|8|1	22	7.33	3	2|0|0	0.67	1	0.67	1	0.67	11	0.03
O75534	P02538	KRT6A	13|7|1	21	7	3	1|0|0	0.67	1	0.67	1	0.67	21	0
O75534	P62910	RPL32	9|7|9	25	8.33	3	0|0|0	1	1	1	1	1	83.33	0
O75534	P18621	RPL17	7|7|7	21	7	3	0|0|0	1	1	1	1	1	70	0
O75534	P84090	ERH	3|4|3	10	3.33	3	0|0|0	1	1	1	1	1	33.33	0
O75534	P27635	RPL10	6|2|5	13	4.33	3	0|0|0	1	1	1	1	1	43.33	0
O75534	P83881	RPL36A	2|3|1	6	2	3	0|0|0	0.67	1	0.67	1	0.67	20	0.04
O75534	P05387	RPLP2	12|9|11	32	10.67	3	0|0|0	1	1	1	1	1	106.67	0
O75534	Q02878	RPL6	10|12|9	31	10.33	3	0|0|0	1	1	1	1	1	103.33	0
O75534	P26373	RPL13	15|11|9	35	11.67	3	0|0|0	1	1	1	1	1	116.67	0
O75534	P42766	RPL35	4|2|2	8	2.67	3	0|0|0	1	1	1	1	1	26.67	0
O75534	P42677	RPS27	4|4|3	11	3.67	3	0|0|0	1	1	1	1	1	36.67	0
O75534	O14950	MYL12B	3|4|1	8	2.67	3	0|0|0	0.67	1	0.67	1	0.67	26.67	0.02
O75534	P32969	RPL9	3|2|2	7	2.33	3	0|0|0	1	1	1	1	1	23.33	0
O75534	Q9Y3U8	RPL36	3|4|4	11	3.67	3	0|0|0	1	1	1	1	1	36.67	0
O75534	P49207	RPL34	3|5|1	9	3	3	0|0|0	0.67	1	0.67	1	0.67	30	0.01
O75534	P62753	RPS6	6|5|3	14	4.67	3	0|0|0	1	1	1	1	1	46.67	0
		142

## Sheet: SK-Mel-147 (-RNAse)
			CSDE1 IP -Rnase				IgG IP
Bait	Human ID	PreyGene	Spec	SpecSum	AvgSpec	NumReplicates	ctrlCounts	AvgP	MaxP	TopoAvgP	TopoMaxP	SaintScore	FoldChange	BFDR
O75534	P30260	CDC27	2|1|2	5	1.67	3	0|0|0	0.66	1	0.66	1	0.66	16.67	0.04
O75534	Q3KQU3	MAP7D1	4|4|4	12	4	3	0|0|0	1	1	1	1	1	40	0
O75534	P46013	MKI67	12|6|10	28	9.33	3	0|0|0	1	1	1	1	1	93.33	0
O75534	P61247	RPS3A	7|8|8	23	7.67	3	1|1|1	1	1	1	1	1	7.67	0
O75534	Q5T9A4	ATAD3B	7|10|8	25	8.33	3	0|0|0	1	1	1	1	1	83.33	0
O75534	Q969Q0	RPL36AL	3|3|0	6	2	3	0|0|0	0.67	1	0.67	1	0.67	20	0.02
O75534	Q13310	PABPC4	19|16|15	50	16.67	3	0|0|0	1	1	1	1	1	166.67	0
O75534	Q6PJG2	MIDEAS	2|2|2	6	2	3	0|0|0	1	1	1	1	1	20	0
O75534	Q6DD87	ZNF787	5|5|4	14	4.67	3	0|0|0	1	1	1	1	1	46.67	0
O75534	P46778	RPL21	5|4|3	12	4	3	0|1|2	0.95	0.99	0.95	0.99	0.95	4	0
O75534	Q13243	SRSF5	3|2|2	7	2.33	3	0|0|0	1	1	1	1	1	23.33	0
O75534	Q6NZI2	CAVIN1	6|10|9	25	8.33	3	1|1|1	1	1	1	1	1	8.33	0
O75534	P18077	RPL35A	4|3|1	8	2.67	3	0|0|0	0.67	1	0.67	1	0.67	26.67	0.02
O75534	Q08211	DHX9	13|10|7	30	10	3	0|0|0	1	1	1	1	1	100	0
O75534	Q9NZI8	IGF2BP1	2|1|4	7	2.33	3	0|0|0	0.67	1	0.67	1	0.67	23.33	0.02
O75534	P62424	RPL7A	12|15|13	40	13.33	3	1|2|1	1	1	1	1	1	10	0
O75534	P06396	GSN	2|2|2	6	2	3	1|0|2	0.69	0.69	0.69	0.69	0.69	2	0.01
O75534	P46776	RPL27A	6|5|5	16	5.33	3	1|1|1	0.99	1	0.99	1	0.99	5.33	0
O75534	P18124	RPL7	15|15|15	45	15	3	0|0|2	1	1	1	1	1	22.5	0
O75534	P08865	RPSA	3|2|2	7	2.33	3	1|0|1	0.9	0.96	0.9	0.96	0.9	3.5	0.01
O75534	P05388	RPLP0	9|9|7	25	8.33	3	2|1|2	1	1	1	1	1	5	0
O75534	P46821	MAP1B	2|0|2	4	1.33	3	0|0|0	0.66	1	0.66	1	0.66	13.33	0.04
O75534	P40429	RPL13A	6|7|4	17	5.67	3	1|1|1	0.99	1	0.99	1	0.99	5.67	0
O75534	P39023	RPL3	16|11|12	39	13	3	5|4|1	0.99	1	0.99	1	0.99	3.9	0
O75534	P11940	PABPC1	31|27|28	86	28.67	3	0|1|1	1	1	1	1	1	43	0
O75534	P35251	RFC1	2|0|2	4	1.33	3	0|0|0	0.66	1	0.66	1	0.66	13.33	0.04
O75534	P30050	RPL12	8|8|8	24	8	3	1|0|1	1	1	1	1	1	12	0
O75534	Q07020	RPL18	7|8|8	23	7.67	3	1|3|3	0.97	0.98	0.97	0.98	0.97	3.29	0
O75534	P38646	HSPA9	9|12|10	31	10.33	3	0|0|0	1	1	1	1	1	103.33	0
O75534	P46779	RPL28	4|4|4	12	4	3	1|1|1	0.97	0.97	0.97	0.97	0.97	4	0
O75534	P46777	RPL5	2|3|4	9	3	3	0|0|0	1	1	1	1	1	30	0
O75534	P05141	SLC25A5	3|3|4	10	3.33	3	0|0|1	1	1	1	1	1	10	0
O75534	P62906	RPL10A	6|8|6	20	6.67	3	0|1|2	1	1	1	1	1	6.67	0
O75534	P60866	RPS20	4|2|5	11	3.67	3	0|0|0	1	1	1	1	1	36.67	0
O75534	P61254	RPL26	6|8|7	21	7	3	1|2|2	0.99	1	0.99	1	0.99	4.2	0
O75534	P61353	RPL27	4|4|3	11	3.67	3	0|1|4	0.72	0.8	0.72	0.8	0.72	2.2	0.01
O75534	P62081	RPS7	6|4|8	18	6	3	0|0|0	1	1	1	1	1	60	0
O75534	P62241	RPS8	11|10|11	32	10.67	3	1|2|0	1	1	1	1	1	10.67	0
O75534	P62244	RPS15A	2|2|2	6	2	3	0|0|0	1	1	1	1	1	20	0
O75534	P62263	RPS14	8|6|7	21	7	3	2|2|0	1	1	1	1	1	5.25	0
O75534	P62266	RPS23	1|2|2	5	1.67	3	0|0|0	0.66	1	0.66	1	0.66	16.67	0.04
O75534	P62269	RPS18	4|4|6	14	4.67	3	1|2|1	0.94	0.99	0.94	0.99	0.94	3.5	0
O75534	P62273	RPS29	3|4|2	9	3	3	1|0|1	0.94	0.99	0.94	0.99	0.94	4.5	0
O75534	P62280	RPS11	4|6|4	14	4.67	3	1|1|1	0.98	1	0.98	1	0.98	4.67	0
O75534	P62314	SNRPD1	3|2|1	6	2	3	0|0|0	0.67	1	0.67	1	0.67	20	0.03
O75534	P62701	RPS4X	9|10|9	28	9.33	3	1|2|0	1	1	1	1	1	9.33	0
O75534	Q02543	RPL18A	6|5|3	14	4.67	3	0|0|0	1	1	1	1	1	46.67	0
O75534	P62750	RPL23A	8|9|7	24	8	3	1|1|1	1	1	1	1	1	8	0
O75534	P62829	RPL23	5|6|3	14	4.67	3	0|0|0	1	1	1	1	1	46.67	0
O75534	P62841	RPS15	0|2|2	4	1.33	3	0|0|0	0.66	1	0.66	1	0.66	13.33	0.04
O75534	P62851	RPS25	2|3|2	7	2.33	3	0|0|0	1	1	1	1	1	23.33	0
O75534	P62888	RPL30	2|4|3	9	3	3	0|0|0	1	1	1	1	1	30	0
O75534	P62891	RPL39	2|2|2	6	2	3	0|0|0	1	1	1	1	1	20	0
O75534	P62899	RPL31	2|2|2	6	2	3	0|0|0	1	1	1	1	1	20	0
O75534	P62917	RPL8	13|15|12	40	13.33	3	2|2|3	1	1	1	1	1	5.71	0
O75534	P67809	YBX1	26|27|35	88	29.33	3	2|5|4	1	1	1	1	1	8	0
O75534	P62995	TRA2B	2|2|1	5	1.67	3	0|0|0	0.66	1	0.66	1	0.66	16.67	0.04
O75534	P08708	RPS17	2|1|3	6	2	3	0|0|0	0.67	1	0.67	1	0.67	20	0.03
O75534	P25398	RPS12	6|5|10	21	7	3	0|0|0	1	1	1	1	1	70	0
O75534	P46783	RPS10	3|2|2	7	2.33	3	0|0|0	1	1	1	1	1	23.33	0
O75534	P35268	RPL22	2|2|2	6	2	3	0|0|0	1	1	1	1	1	20	0
O75534	P84098	RPL19	12|8|11	31	10.33	3	1|2|2	1	1	1	1	1	6.2	0
O75534	P84103	SRSF3	4|6|7	17	5.67	3	0|0|0	1	1	1	1	1	56.67	0
O75534	P46782	RPS5	5|4|4	13	4.33	3	0|0|0	1	1	1	1	1	43.33	0
O75534	Q16637	SMN2	2|2|0	4	1.33	3	0|0|0	0.66	1	0.66	1	0.66	13.33	0.04
O75534	Q13283	G3BP1	4|3|6	13	4.33	3	0|0|0	1	1	1	1	1	43.33	0
O75534	Q13247	SRSF6	7|7|5	19	6.33	3	0|0|0	1	1	1	1	1	63.33	0
O75534	Q7Z2W4	ZC3HAV1	2|2|1	5	1.67	3	0|0|0	0.66	1	0.66	1	0.66	16.67	0.04
O75534	O95714	HERC2	5|5|5	15	5	3	0|0|0	1	1	1	1	1	50	0
O75534	Q8IYB3	SRRM1	4|5|4	13	4.33	3	0|0|0	1	1	1	1	1	43.33	0
O75534	Q9Y6M1	IGF2BP2	1|2|2	5	1.67	3	0|0|0	0.66	1	0.66	1	0.66	16.67	0.04
O75534	P68400	CSNK2A1	2|3|3	8	2.67	3	0|0|0	1	1	1	1	1	26.67	0
O75534	Q14444	CAPRIN1	4|3|6	13	4.33	3	1|1|3	0.74	0.98	0.74	0.98	0.74	2.6	0.01
O75534	Q92974	ARHGEF2	11|10|9	30	10	3	0|0|0	1	1	1	1	1	100	0
O75534	P17844	DDX5	3|2|2	7	2.33	3	0|0|0	1	1	1	1	1	23.33	0
O75534	Q01130	SRSF2	6|5|7	18	6	3	1|2|2	0.96	0.99	0.96	0.99	0.96	3.6	0
O75534	Q5SW79	CEP170	54|53|45	152	50.67	3	0|0|0	1	1	1	1	1	506.67	0
O75534	Q9NZB2	FAM120A	2|2|1	5	1.67	3	0|0|0	0.66	1	0.66	1	0.66	16.67	0.04
O75534	Q16630	CPSF6	3|2|2	7	2.33	3	0|0|0	1	1	1	1	1	23.33	0
O75534	Q07955	SRSF1	9|11|12	32	10.67	3	0|0|0	1	1	1	1	1	106.67	0
O75534	Q6PKG0	LARP1	6|5|5	16	5.33	3	0|0|0	1	1	1	1	1	53.33	0
O75534	P46781	RPS9	1|3|2	6	2	3	0|0|0	0.67	1	0.67	1	0.67	20	0.03
O75534	O60506	SYNCRIP	5|5|4	14	4.67	3	0|0|0	1	1	1	1	1	46.67	0
O75534	Q16629	SRSF7	2|2|2	6	2	3	0|0|0	1	1	1	1	1	20	0
O75534	P83731	RPL24	4|3|6	13	4.33	3	0|0|1	1	1	1	1	1	13	0
O75534	Q14257	RCN2	2|2|1	5	1.67	3	0|0|0	0.66	1	0.66	1	0.66	16.67	0.04
O75534	Q9UQ35	SRRM2	22|27|23	72	24	3	0|0|0	1	1	1	1	1	240	0
O75534	Q71RC2	LARP4	4|4|4	12	4	3	0|0|0	1	1	1	1	1	40	0
O75534	Q96HS1	PGAM5	7|7|6	20	6.67	3	0|0|1	1	1	1	1	1	20	0
O75534	Q96PK6	RBM14	5|5|6	16	5.33	3	0|0|0	1	1	1	1	1	53.33	0
O75534	P43243	MATR3	2|2|2	6	2	3	0|0|0	1	1	1	1	1	20	0
O75534	Q9NUQ6	SPATS2L	3|4|5	12	4	3	0|0|0	1	1	1	1	1	40	0
O75534	Q9NVI7	ATAD3A	13|13|15	41	13.67	3	0|0|0	1	1	1	1	1	136.67	0
O75534	Q9UG63	ABCF2	4|2|0	6	2	3	0|0|0	0.67	1	0.67	1	0.67	20	0.02
O75534	Q7L2E3	DHX30	2|3|1	6	2	3	0|0|0	0.67	1	0.67	1	0.67	20	0.03
O75534	O00425	IGF2BP3	3|2|4	9	3	3	0|0|0	1	1	1	1	1	30	0
O75534	O43809	NUDT21	2|2|3	7	2.33	3	0|0|0	1	1	1	1	1	23.33	0
O75534	P63220	RPS21	2|2|2	6	2	3	0|0|0	1	1	1	1	1	20	0
O75534	P50914	RPL14	5|6|5	16	5.33	3	1|1|1	0.99	1	0.99	1	0.99	5.33	0
O75534	P62913	RPL11	6|7|6	19	6.33	3	2|1|2	0.98	0.99	0.98	0.99	0.98	3.8	0
O75534	Q8NC51	SERBP1	2|3|5	10	3.33	3	1|0|0	0.99	1	0.99	1	0.99	10	0
O75534	P61313	RPL15	8|8|10	26	8.67	3	1|1|2	1	1	1	1	1	6.5	0
O75534	P52272	HNRNPM	24|18|25	67	22.33	3	2|2|0	1	1	1	1	1	16.75	0
O75534	P36578	RPL4	13|20|20	53	17.67	3	3|3|6	1	1	1	1	1	4.42	0
O75534	Q92900	UPF1	7|4|6	17	5.67	3	0|0|0	1	1	1	1	1	56.67	0
O75534	Q14764	MVP	16|19|16	51	17	3	0|0|0	1	1	1	1	1	170	0
O75534	Q9NR30	DDX21	12|11|12	35	11.67	3	0|0|0	1	1	1	1	1	116.67	0
O75534	P16989	YBX3	13|17|21	51	17	3	0|1|2	1	1	1	1	1	17	0
O75534	Q9Y230	RUVBL2	4|4|3	11	3.67	3	0|0|0	1	1	1	1	1	36.67	0
O75534	O95793	STAU1	6|6|5	17	5.67	3	0|0|0	1	1	1	1	1	56.67	0
O75534	Q12906	ILF3	15|13|17	45	15	3	0|0|0	1	1	1	1	1	150	0
O75534	Q9Y3F4	STRAP	17|18|19	54	18	3	0|0|0	1	1	1	1	1	180	0
O75534	P07910	HNRNPC	2|4|3	9	3	3	0|0|0	1	1	1	1	1	30	0
O75534	P26373	RPL13	6|8|8	22	7.33	3	3|2|2	0.93	0.98	0.93	0.98	0.93	3.14	0
O75534	Q02878	RPL6	8|8|12	28	9.33	3	3|1|4	0.97	1	0.97	1	0.97	3.5	0
O75534	P62910	RPL32	8|10|9	27	9	3	2|4|4	0.86	0.97	0.86	0.97	0.86	2.7	0.01
O75534	P49207	RPL34	3|5|4	12	4	3	1|1|2	0.87	0.97	0.87	0.97	0.87	3	0.01
O75534	P27635	RPL10	9|9|8	26	8.67	3	1|1|1	1	1	1	1	1	8.67	0
O75534	P42766	RPL35	5|5|5	15	5	3	1|2|0	0.99	0.99	0.99	0.99	0.99	5	0
O75534	P42677	RPS27	4|5|3	12	4	3	0|0|0	1	1	1	1	1	40	0
O75534	P62753	RPS6	6|6|5	17	5.67	3	0|0|1	1	1	1	1	1	17	0
O75534	P32969	RPL9	2|3|2	7	2.33	3	0|0|0	1	1	1	1	1	23.33	0
O75534	P84090	ERH	2|3|2	7	2.33	3	0|0|0	1	1	1	1	1	23.33	0
O75534	P18621	RPL17	11|6|9	26	8.67	3	0|0|1	1	1	1	1	1	26	0
O75534	Q9Y3U8	RPL36	7|8|5	20	6.67	3	0|0|1	1	1	1	1	1	20	0
		125

## Sheet: CSDE1 interactors
Human ID	Protein	Melanocytes	Mel-ST	SK-Mel-147	RBP	RAP
Q6DD87	ZNF787	YES	YES	YES	NO	NO
P38646	HSPA9	YES	YES	YES	YES	YES
O00425	IGF2BP3	YES	YES	YES	YES	YES
Q14764	MVP	YES	YES	YES	YES	YES
Q9Y3F4	STRAP	YES	YES	YES	YES	YES
P30260	CDC27	YES	NO	YES	NO	YES
Q9Y6M1	IGF2BP2	YES	NO	YES	YES	YES
Q7L2E3	DHX30	YES	NO	YES	YES	YES
Q92900	UPF1	YES	NO	YES	YES	YES
Q6PJG2	MIDEAS	YES	NO	YES	NO	NO
P27635	RPL10	NO	YES	YES	YES	NO
P62280	RPS11	NO	YES	YES	YES	NO
P62851	RPS25	NO	YES	YES	YES	NO
P08708	RPS17	NO	YES	YES	YES	NO
P67809	YBX1	NO	YES	YES	YES	YES
P61247	RPS3A	NO	YES	YES	YES	NO
Q7Z2W4	ZC3HAV1	NO	YES	YES	YES	YES
Q01130	SRSF2	NO	YES	YES	YES	YES
P62829	RPL23	NO	YES	YES	YES	NO
P30050	RPL12	NO	YES	YES	YES	NO
P18621	RPL17	NO	YES	YES	YES	NO
P62906	RPL10A	NO	YES	YES	YES	NO
P61254	RPL26	NO	YES	YES	YES	NO
P62269	RPS18	NO	YES	YES	YES	NO
P46013	MKI67	NO	YES	YES	YES	NO
Q9NUQ6	SPATS2L	NO	YES	YES	YES	YES
Q13283	G3BP1	NO	YES	YES	YES	YES
P49207	RPL34	NO	YES	YES	YES	NO
P25398	RPS12	NO	YES	YES	YES	NO
Q13310	PABPC4	NO	YES	YES	YES	YES
P84098	RPL19	NO	YES	YES	YES	NO
Q13243	SRSF5	NO	YES	YES	YES	YES
P52272	HNRNPM	NO	YES	YES	YES	YES
P46779	RPL28	NO	YES	YES	YES	NO
Q07955	SRSF1	NO	YES	YES	YES	YES
P18124	RPL7	NO	YES	YES	YES	NO
P43243	MATR3	NO	YES	YES	YES	YES
P84090	ERH	NO	YES	YES	YES	NO
Q02543	RPL18A	NO	YES	YES	YES	NO
P05388	RPLP0	NO	YES	YES	YES	NO
O60506	SYNCRIP	NO	YES	YES	YES	YES
Q02878	RPL6	NO	YES	YES	YES	NO
P62701	RPS4X	NO	YES	YES	YES	NO
Q8NC51	SERBP1	NO	YES	YES	YES	YES
P40429	RPL13A	NO	YES	YES	YES	NO
Q9Y3U8	RPL36	NO	YES	YES	YES	NO
P39023	RPL3	NO	YES	YES	YES	NO
P35251	RFC1	NO	YES	YES	YES	NO
Q12906	ILF3	NO	YES	YES	YES	YES
P62263	RPS14	NO	YES	YES	YES	NO
P46782	RPS5	NO	YES	YES	YES	NO
Q6PKG0	LARP1	NO	YES	YES	YES	YES
P62888	RPL30	NO	YES	YES	YES	NO
Q92974	ARHGEF2	NO	YES	YES	YES	NO
P62081	RPS7	NO	YES	YES	YES	NO
P62424	RPL7A	NO	YES	YES	YES	NO
Q5T9A4	ATAD3B	NO	YES	YES	YES	NO
P61353	RPL27	NO	YES	YES	YES	NO
P83731	RPL24	NO	YES	YES	YES	NO
O95714	HERC2	NO	YES	YES	YES	NO
P62753	RPS6	NO	YES	YES	YES	NO
Q07020	RPL18	NO	YES	YES	YES	NO
P62910	RPL32	NO	YES	YES	YES	NO
Q3KQU3	MAP7D1	NO	YES	YES	NO	NO
P84103	SRSF3	NO	YES	YES	YES	YES
Q6NZI2	CAVIN1	NO	YES	YES	NO	NO
Q9UQ35	SRRM2	NO	YES	YES	YES	YES
P50914	RPL14	NO	YES	YES	YES	NO
P11940	PABPC1	NO	YES	YES	YES	YES
P42766	RPL35	NO	YES	YES	YES	NO
Q9NVI7	ATAD3A	NO	YES	YES	NO	YES
P46778	RPL21	NO	YES	YES	YES	NO
P46783	RPS10	NO	YES	YES	YES	NO
P62266	RPS23	NO	YES	YES	YES	NO
P62913	RPL11	NO	YES	YES	YES	NO
P46776	RPL27A	NO	YES	YES	YES	NO
P32969	RPL9	NO	YES	YES	YES	NO
P62273	RPS29	NO	YES	YES	NO	NO
P62917	RPL8	NO	YES	YES	YES	NO
O95793	STAU1	NO	YES	YES	YES	YES
P16989	YBX3	NO	YES	YES	YES	YES
Q9NR30	DDX21	NO	YES	YES	YES	YES
Q96PK6	RBM14	NO	YES	YES	YES	YES
Q14444	CAPRIN1	NO	YES	YES	YES	YES
P46777	RPL5	NO	YES	YES	YES	NO
P62241	RPS8	NO	YES	YES	YES	NO
P07910	HNRNPC	NO	YES	YES	YES	YES
P36578	RPL4	NO	YES	YES	YES	NO
P62750	RPL23A	NO	YES	YES	YES	NO
Q5SW79	CEP170	NO	YES	YES	YES	YES
Q8IYB3	SRRM1	NO	YES	YES	YES	YES
P26373	RPL13	NO	YES	YES	YES	NO
P05141	SLC25A5	NO	YES	YES	YES	YES
Q08211	DHX9	NO	YES	YES	YES	YES
P61313	RPL15	NO	YES	YES	YES	NO
P62899	RPL31	NO	YES	YES	YES	NO
P42677	RPS27	NO	YES	YES	YES	NO
Q13247	SRSF6	NO	YES	YES	YES	YES
Q9H792	PEAK1	YES	NO	NO	NO	NO
A0MZ66	SHTN1	YES	NO	NO	NO	NO
Q8WXW3	PIBF1	YES	NO	NO	YES	NO
Q7Z3E5	ARMC9	YES	NO	NO	NO	NO
Q9Y4D8	HECTD4	YES	NO	NO	NO	NO
Q9H1A4	ANAPC1	YES	NO	NO	YES	YES
Q9H6S1	AZI2	YES	NO	NO	NO	NO
P01024	C3	YES	NO	NO	NO	NO
Q9UKK3	PARP4	YES	NO	NO	YES	YES
Q9UJX3	ANAPC7	YES	NO	NO	NO	YES
Q7Z2K8	GPRIN1	YES	NO	NO	NO	NO
Q14643	ITPR1	YES	NO	NO	NO	NO
P49815	TSC2	YES	NO	NO	YES	NO
Q13042	CDC16	YES	NO	NO	NO	YES
P61964	WDR5	YES	NO	NO	YES	YES
Q9UJX2	CDC23	YES	NO	NO	NO	YES
Q9UHD2	TBK1	YES	NO	NO	YES	NO
Q14571	ITPR2	YES	NO	NO	YES	NO
P19823	ITIH2	YES	NO	NO	NO	NO
O15169	AXIN1	YES	NO	NO	NO	NO
Q9Y597	KCTD3	YES	NO	NO	NO	NO
Q14573	ITPR3	YES	NO	NO	YES	NO
P0C0L4	C4A	YES	NO	NO	NO	NO
P35270	SPR	YES	NO	NO	NO	NO
P07996	THBS1	YES	NO	NO	NO	YES
P78362	SRPK2	YES	NO	NO	YES	NO
Q9HD42	CHMP1A	YES	NO	NO	NO	NO
P01031	C5	YES	NO	NO	NO	NO
Q9P2R6	RERE	YES	NO	NO	NO	NO
O75592	MYCBP2	YES	NO	NO	YES	NO
Q01105	SET	YES	NO	NO	YES	YES
P04196	HRG	YES	NO	NO	NO	NO
Q8NHZ8	CDC26	YES	NO	NO	NO	YES
O15027	SEC16A	YES	NO	NO	YES	YES
Q96DE5	ANAPC16	YES	NO	NO	NO	NO
Q8IVF2	AHNAK2	YES	NO	NO	YES	NO
Q92574	TSC1	YES	NO	NO	NO	NO
Q16555	DPYSL2	YES	NO	NO	YES	YES
Q96JN8	NEURL4	YES	NO	NO	YES	NO
Q96PE2	ARHGEF17	YES	NO	NO	NO	NO
Q8N2K0	ABHD12	YES	NO	NO	YES	NO
P28290	ITPRID2	YES	NO	NO	NO	NO
Q9Y4F5	CEP170B	YES	NO	NO	NO	NO
P30101	PDIA3	YES	NO	NO	YES	YES
P27824	CANX	YES	NO	NO	YES	YES
P53396	ACLY	YES	NO	NO	YES	YES
Q15154	PCM1	YES	NO	NO	YES	NO
Q02241	KIF23	NO	YES	NO	YES	NO
Q12965	MYO1E	NO	YES	NO	NO	NO
P07437	TUBB	NO	YES	NO	YES	YES
P16402	H1-3	NO	YES	NO	NO	YES
Q92522	H1-10	NO	YES	NO	NO	YES
P04264	KRT1	NO	YES	NO	NO	YES
P68363	TUBA1B	NO	YES	NO	YES	YES
P0DP23	CALM1	NO	YES	NO	YES	NO
P08670	VIM	NO	YES	NO	YES	YES
P15880	RPS2	NO	YES	NO	YES	NO
O43795	MYO1B	NO	YES	NO	YES	YES
P60709	ACTB	NO	YES	NO	NO	YES
P62854	RPS26	NO	YES	NO	YES	NO
P23396	RPS3	NO	YES	NO	YES	NO
P11142	HSPA8	NO	YES	NO	YES	YES
P63261	ACTG1	NO	YES	NO	YES	YES
P68133	ACTA1	NO	YES	NO	NO	YES
P68371	TUBB4B	NO	YES	NO	YES	YES
Q9BQE3	TUBA1C	NO	YES	NO	YES	YES
Q9UHX1	PUF60	NO	YES	NO	YES	YES
P60660	MYL6	NO	YES	NO	YES	YES
P02533	KRT14	NO	YES	NO	NO	YES
P06748	NPM1	NO	YES	NO	YES	YES
Q16777	H2AC20	NO	YES	NO	NO	YES
Q5UIP0	RIF1	NO	YES	NO	YES	NO
Q71UM5	RPS27L	NO	YES	NO	YES	NO
Q9Y383	LUC7L2	NO	YES	NO	YES	YES
Q63ZY3	KANK2	NO	YES	NO	NO	NO
Q9BTC0	DIDO1	NO	YES	NO	YES	NO
P35579	MYH9	NO	YES	NO	YES	YES
Q08170	SRSF4	NO	YES	NO	YES	YES
Q9BUF5	TUBB6	NO	YES	NO	YES	NO
P46087	NOP2	NO	YES	NO	YES	YES
P13647	KRT5	NO	YES	NO	NO	YES
Q9P2E9	RRBP1	NO	YES	NO	YES	YES
Q12905	ILF2	NO	YES	NO	YES	YES
P39019	RPS19	NO	YES	NO	YES	NO
P04350	TUBB4A	NO	YES	NO	NO	YES
Q9UKV3	ACIN1	NO	YES	NO	YES	YES
Q04695	KRT17	NO	YES	NO	NO	YES
Q15149	PLEC	NO	YES	NO	YES	YES
O00159	MYO1C	NO	YES	NO	YES	YES
P38159	RBMX	NO	YES	NO	YES	YES
P08779	KRT16	NO	YES	NO	NO	YES
P04259	KRT6B	NO	YES	NO	NO	YES
P02538	KRT6A	NO	YES	NO	NO	YES
P83881	RPL36A	NO	YES	NO	YES	NO
P05387	RPLP2	NO	YES	NO	NO	NO
O14950	MYL12B	NO	YES	NO	NO	YES
Q969Q0	RPL36AL	NO	NO	YES	NO	NO
P18077	RPL35A	NO	NO	YES	YES	NO
Q9NZI8	IGF2BP1	NO	NO	YES	YES	YES
P06396	GSN	NO	NO	YES	NO	YES
P08865	RPSA	NO	NO	YES	YES	NO
P46821	MAP1B	NO	NO	YES	YES	YES
P60866	RPS20	NO	NO	YES	YES	NO
P62244	RPS15A	NO	NO	YES	YES	NO
P62314	SNRPD1	NO	NO	YES	YES	YES
P62841	RPS15	NO	NO	YES	YES	NO
P62891	RPL39	NO	NO	YES	YES	NO
P62995	TRA2B	NO	NO	YES	YES	YES
P35268	RPL22	NO	NO	YES	YES	NO
Q16637	SMN2	NO	NO	YES	YES	YES
P68400	CSNK2A1	NO	NO	YES	YES	YES
P17844	DDX5	NO	NO	YES	YES	YES
Q9NZB2	FAM120A	NO	NO	YES	YES	YES
Q16630	CPSF6	NO	NO	YES	YES	YES
P46781	RPS9	NO	NO	YES	YES	NO
Q16629	SRSF7	NO	NO	YES	YES	YES
Q14257	RCN2	NO	NO	YES	NO	YES
Q71RC2	LARP4	NO	NO	YES	YES	YES
Q96HS1	PGAM5	NO	NO	YES	YES	YES
Q9UG63	ABCF2	NO	NO	YES	YES	YES
O43809	NUDT21	NO	NO	YES	YES	YES
P63220	RPS21	NO	NO	YES	YES	NO
Q9Y230	RUVBL2	NO	NO	YES	YES	YES

## Sheet: RNA-dependent interactions
Protein	Melanocytes	Mel-ST	SK-Mel-147
IGF2BP3	YES	YES	YES
IGF2BP2	YES	NO	YES
UPF1	YES	NO	YES
YBX3	NO	YES	YES
STAU1	NO	YES	YES
PABPC1	NO	YES	YES
HNRNPC	NO	YES	YES
SERBP1	NO	YES	YES
DHX9	NO	YES	YES
PABPC4	NO	YES	YES
SYNCRIP	NO	YES	YES
G3BP1	NO	YES	YES
ILF3	NO	YES	YES
YBX1	NO	YES	YES
CAPRIN1	NO	YES	YES
DDX21	NO	YES	NO
RBMX	NO	YES	NO
MATR3	NO	YES	NO
LARP1	NO	YES	NO
DIDO1	NO	YES	NO
ZC3HAV1	NO	YES	NO
ILF2	NO	YES	NO
LARP4	NO	NO	YES
IGF2BP1	NO	NO	YES
FAM120A	NO	NO	YES

## Sheet: Overlaps
Common proteins		Common Melanocytes and SK-Mel-147		Unique in Melanocytes			Unique in Mel-ST		Unique SK-Mel-147				Common Mel-ST and SK-Mel-147
ZNF787		CDC27		PEAK1			KIF23		RPL36AL				RPL10
HSPA9		IGF2BP2		SHTN1			MYO1E		RPL35A				RPS11
IGF2BP3		DHX30		PIBF1			TUBB		IGF2BP1				RPS25
MVP		UPF1		ARMC9			H1-3		GSN				RPS17
STRAP		MIDEAS		HECTD4			H1-10		RPSA				YBX1
				ANAPC1			KRT1		MAP1B				RPS3A
				AZI2			TUBA1B		RPS20				ZC3HAV1
				C3			CALM1		RPS15A				SRSF2
				PARP4			VIM		SNRPD1				RPL23
				ANAPC7			RPS2		RPS15				RPL12
				GPRIN1			MYO1B		RPL39				RPL17
				ITPR1			ACTB		TRA2B				RPL10A
				TSC2			RPS26		RPL22				RPL26
				CDC16			RPS3		SMN2				RPS18
				WDR5			HSPA8		CSNK2A1				MKI67
				CDC23			ACTG1		DDX5				SPATS2L
				TBK1			ACTA1		FAM120A				G3BP1
				ITPR2			TUBB4B		CPSF6				RPL34
				ITIH2			TUBA1C		RPS9				RPS12
				AXIN1			PUF60		SRSF7				PABPC4
				KCTD3			MYL6		RCN2				RPL19
				ITPR3			KRT14		LARP4				SRSF5
				C4A			NPM1		PGAM5				HNRNPM
				SPR			H2AC20		ABCF2				RPL28
				THBS1			RIF1		NUDT21				SRSF1
				SRPK2			RPS27L		RPS21				RPL7
				CHMP1A			LUC7L2		RUVBL2				MATR3
				C5			KANK2						ERH
				RERE			DIDO1						RPL18A
				MYCBP2			MYH9						RPLP0
				SET			SRSF4						SYNCRIP
				HRG			TUBB6						RPL6
				CDC26			NOP2						RPS4X
				SEC16A			KRT5						SERBP1
				ANAPC16			RRBP1						RPL13A
				AHNAK2			ILF2						RPL36
				TSC1			RPS19						RPL3
				DPYSL2			TUBB4A						RFC1
				NEURL4			ACIN1						ILF3
				ARHGEF17			KRT17						RPS14
				ABHD12			PLEC						RPS5
				ITPRID2			MYO1C						LARP1
				CEP170B			RBMX						RPL30
				PDIA3			KRT16						ARHGEF2
				CANX			KRT6B						RPS7
				ACLY			KRT6A						RPL7A
				PCM1			RPL36A						ATAD3B
							RPLP2						RPL27
							MYL12B						RPL24
													HERC2
													RPS6
													RPL18
													RPL32
													MAP7D1
													SRSF3
													CAVIN1
													SRRM2
													RPL14
													PABPC1
													RPL35
													ATAD3A
													RPL21
													RPS10
													RPS23
													RPL11
													RPL27A
													RPL9
													RPS29
													RPL8
													STAU1
													YBX3
													DDX21
													RBM14
													CAPRIN1
													RPL5
													RPS8
													HNRNPC
													RPL4
													RPL23A
													CEP170
													SRRM1
													RPL13
													SLC25A5
													DHX9
													RPL15
													RPL31
													RPS27
													SRSF6
